# Supplementary material
Source: Springer Nature journal article supplement (https://www.springermedizin.de/resource/supplementary/12865_2013_577_MOESM4_ESM.pdf/9428270)

DM  
LN + OW + OBS

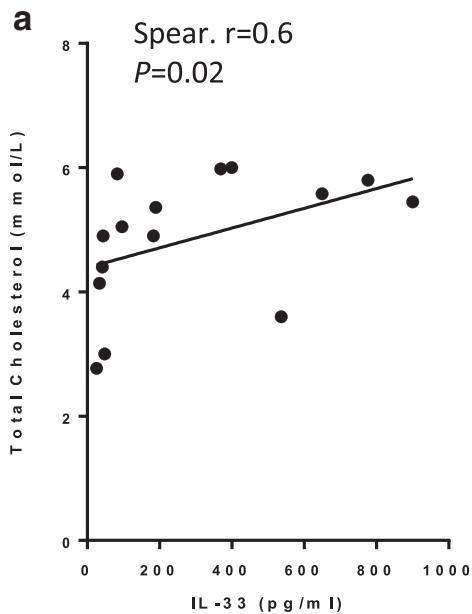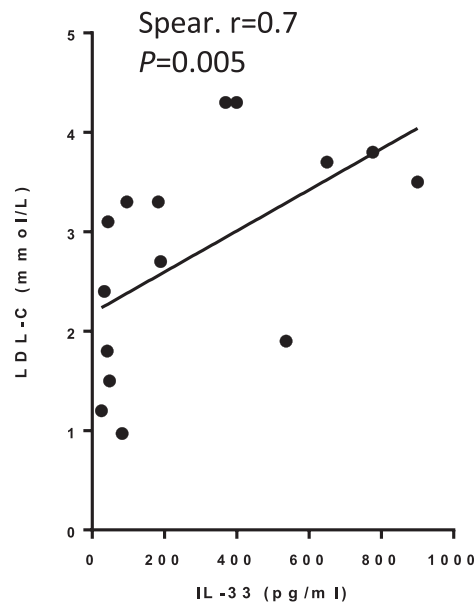

DM OBS

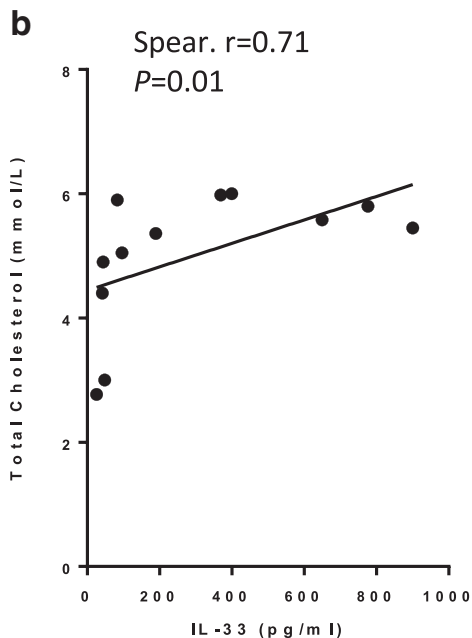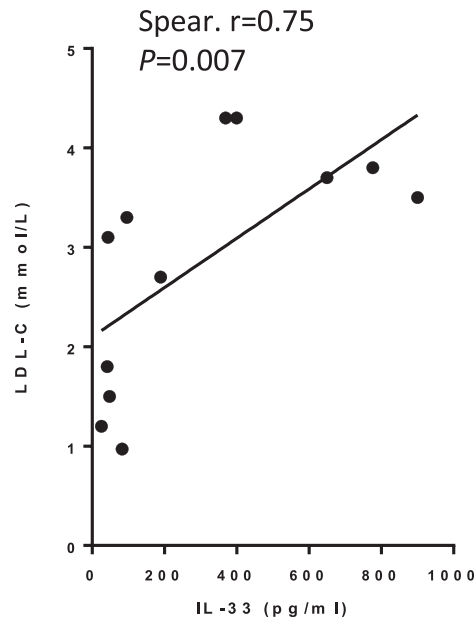

Supplement: MOESM4 [file 9428270]
